# Supplementary material
Source: PubMed Central journal article supplement (PMC6309430)
Supplement: NIHMS858175-supplement.pdf [file NIHMS858175-supplement.pdf]

Supplementary Information

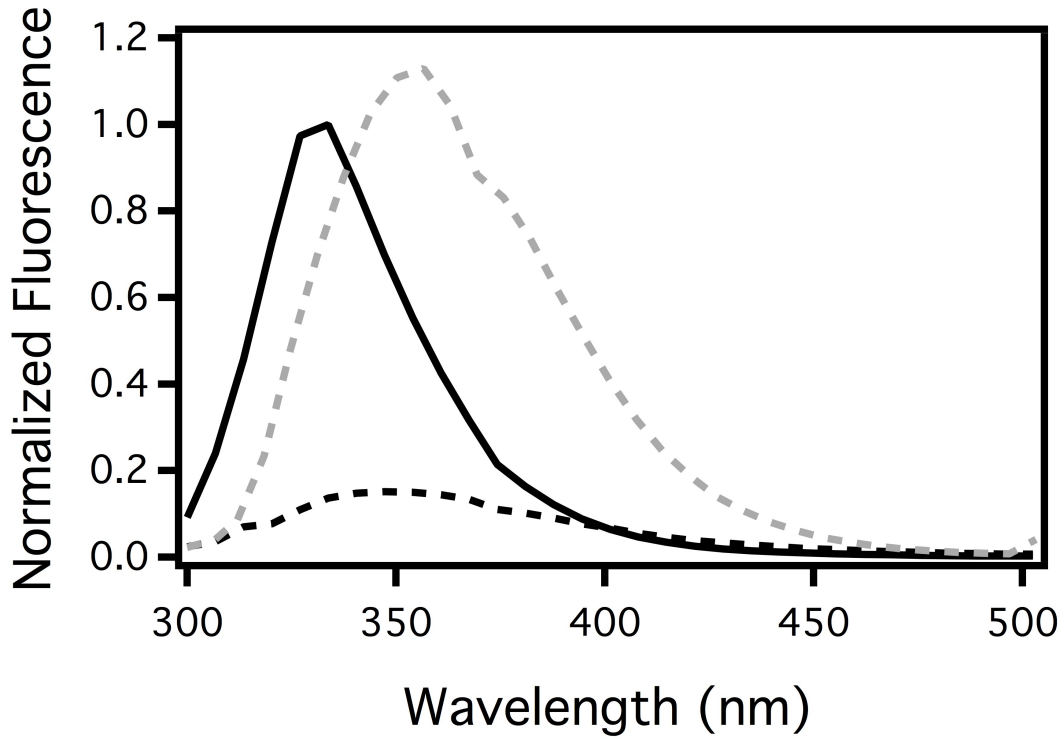

**Supplementary Figure 1:** *The maximum fluorescence emission overlap between ETT, STT and Pgp.* The figure shows the fluorescence emission spectra of 1  $\mu\text{M}$  Pgp (solid, black line), 400  $\mu\text{M}$  ETT (dashed, black line) and 400  $\mu\text{M}$  STT (dashed, gray line) after excitation at 295 nm, 280 nm and 295 nm, respectively. The fluorescence emission spectra of ETT and STT in the figure are shown at the highest drug concentrations used in the study.
